# Supplementary material
Source: Springer Nature journal article supplement (https://www.springermedizin.de/resource/supplementary/12955_2007_454_MOESM1_ESM.pdf/9560490)

Pearson item-scale correlations

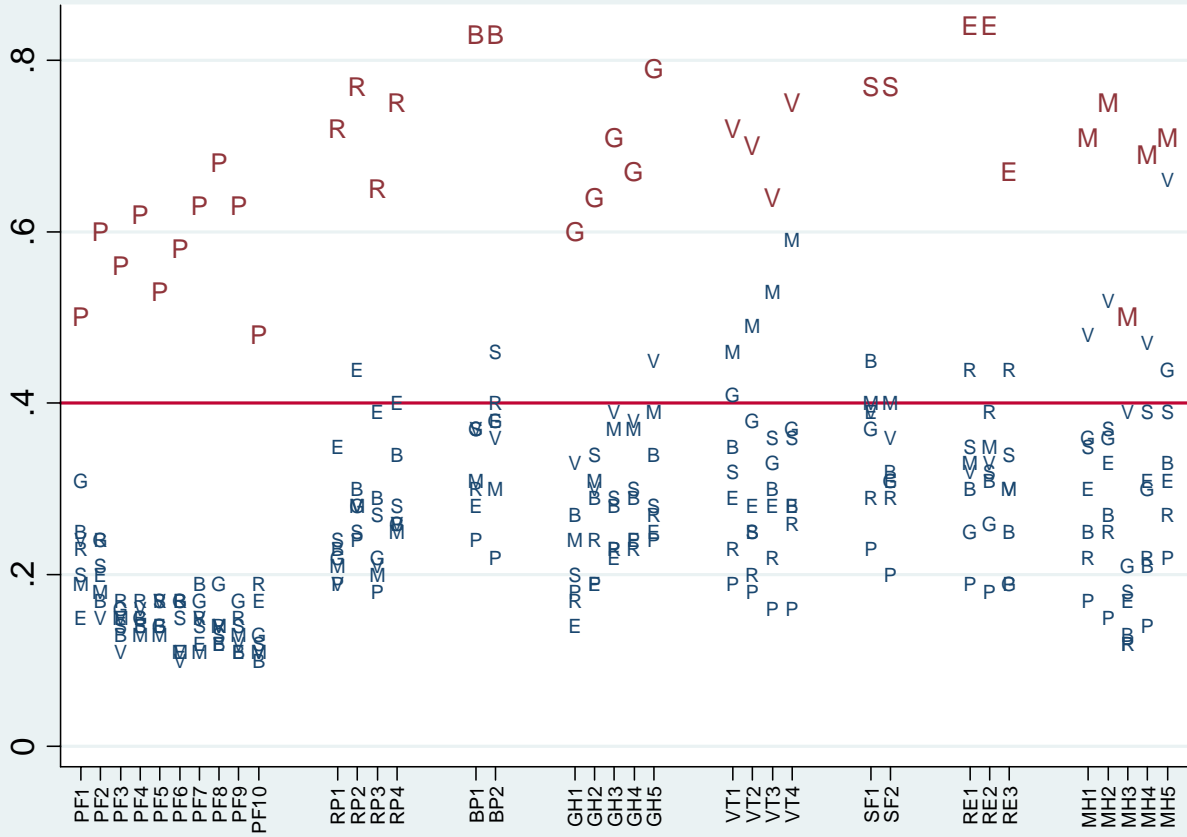

Supplement: MOESM1 [file 9560490]
